# Supplementary material for: Microbial Composition of Fermented Korean Soy Paste (Doenjang) Prepared by Adding Different Herbs during Fermentation
Source: MDPI journal article supplement (doi:10.3390/fermentation7020093), 2021-06-10
Supplement: s1 [file s1]

**Table S1.** Sequencing results, showing the total bases, read count, GC%, Q20% and Q30% of each soy paste sample

| Sample | Total bases | Read count | GC (%) | Q20 (%) | Q30 (%) |
|--------|-------------|------------|--------|---------|---------|
| SPC1   | 51,969,506  | 112,034    | 52.56  | 98.48   | 94.57   |
| SPC2   | 65,807,197  | 141,945    | 52.47  | 98.91   | 96.06   |
| SPC3   | 56,339,664  | 121,487    | 52.47  | 98.81   | 95.73   |
| SPT1   | 71,376,262  | 153,751    | 53.48  | 98.73   | 95.71   |
| SPT2   | 56,598,247  | 121,870    | 53.44  | 98.88   | 96.05   |
| SPT3   | 59,022,722  | 127,135    | 53.46  | 98.82   | 95.83   |
| SPB1   | 69,420,934  | 149,742    | 53.53  | 98.32   | 94.56   |
| SPB2   | 61,737,075  | 133,137    | 53.70  | 98.31   | 94.53   |
| SPB3   | 60,024,541  | 129,548    | 53.81  | 98.27   | 94.42   |
| SPM1   | 60,020,300  | 130,879    | 55.23  | 98.09   | 93.79   |
| SPM2   | 49,832,693  | 108,066    | 54.03  | 98.14   | 93.96   |
| SPM3   | 59,121,305  | 128,549    | 54.42  | 98.14   | 93.97   |

SPC, soy paste control; SPT, soy paste prepared by adding coriander during fermentation; SPB, soy paste prepared by adding Korean mint during fermentation; SPM, soy paste prepared by adding Peppermint during fermentation.
